# Supplementary material for: Mediating physicochemical properties and paclitaxel release of pH-responsive H-type multiblock copolymer self-assembly nanomicelles through epoxidation
Source: Royal Society of Chemistry journal article supplement (doi:10.1039/c7tb00073a), 2017-01-01
Supplement: c7tb00073a1.pdf [file c7tb00073a1.pdf]

## Supporting information

### **Mediating physicochemical properties and paclitaxel release of pH-responsive H-type poly(methacrylic acid)<sub>2</sub>-*block*-hydroxyl-terminated polybutadiene-*block*-poly(methacrylic acid)<sub>2</sub> copolymer self-assembly nanomicelles through epoxidation**

Yan-Ling Luo\*, Xue-Yin Zhang, Yuan Wang, Fang-Jie Han, Feng Xu\*, Ya-Shao Chen  
(Key Laboratory of Macromolecular Science of Shaanxi Province, School of Chemistry and Chemical Engineering, Shaanxi Normal University, Xi'an 710062, P. R. China)

---

Contact details for corresponding authors

**Yan-Ling Luo & Feng Xu**

Fax: +86 29 81530727;

E-mail address: [luoyanl@snnu.edu.cn](mailto:luoyanl@snnu.edu.cn) (Y. L. Luo).and [fengxu@snnu.edu.cn](mailto:fengxu@snnu.edu.cn) (F. Xu)

Affiliations: Key Laboratory of Macromolecular Science of Shaanxi Province, School of Chemistry & Chemical Engineering, Shaanxi Normal University, Xi'an 710062, People's Republic of China.

## 1. Synthesis of H-type PtBMA<sub>2</sub>-*b*-epoHTPB-*b*-PtBMA<sub>2</sub> block copolymers

Synthesis of pH-sensitive H-type PtBMA<sub>2</sub>-*b*-epoHTPB-*b*-PtBMA<sub>2</sub> block copolymers was achieved via the following two-step reaction process, as shown in Figure S1, and the detailed synthesis procedure was described as follows.

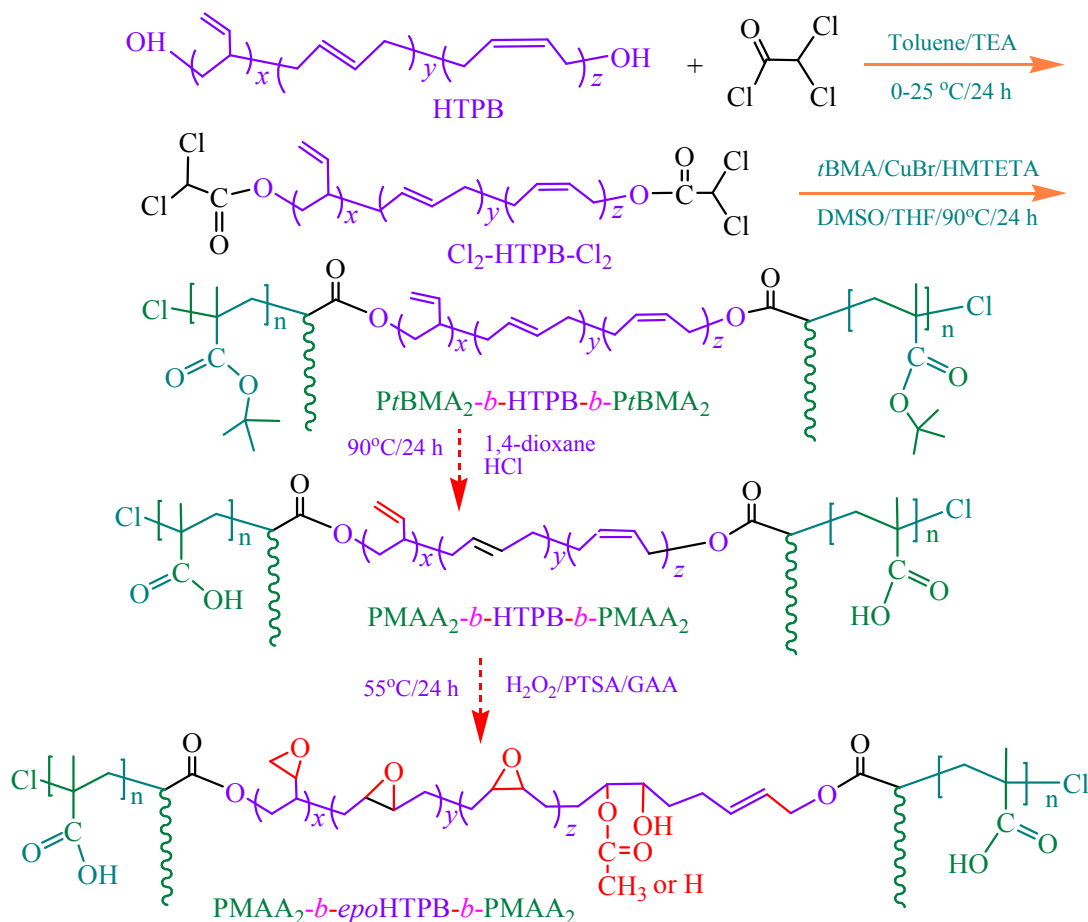

Figure S1 Schematic diagram of synthesis route of a representative H-type PMAA<sub>2</sub>-*b*-epoHTPB-*b*-PMAA<sub>2</sub> block copolymer.

### 1.1 Preparation of Cl<sub>2</sub>-HTPB-Cl<sub>2</sub>

Macroinitiator Cl<sub>2</sub>-HTPB-Cl<sub>2</sub> was first synthesized in a three-neck flask at molar ratios of HTPB/DCC/TEA of 1:4.3:4.3. In detail, 1.87 g (0.813 mmol) HTPB and 0.49 ml (3.496 mmol) TEA were in sequence dissolved in 30 ml dried toluene. After the solution was cooled to 0 °C in an ice-water bath, 0.28 ml (3.496 mmol) DCC dissolved in 10 ml dried toluene in advance was dropwise added into the aforementioned solution

within 1 h under the protection of dried N<sub>2</sub>. The reaction was conducted at 0 °C for 2 h, and then at 25 °C for 24 h. The resulting mixture solution was filtrated to remove quaternary ammonium salt, followed by rotary evaporation to remove most of the solvent prior to precipitation into 10-fold methanol. The precipitate was dried at room temperature under vacuum for 24 h to offer a final product Cl<sub>2</sub>-HTPB-Cl<sub>2</sub> (*Mean yield*, 80 %).

## 1.2 Synthesis of PtBMA<sub>2</sub>-*b*-HTPB-*b*-PtBMA<sub>2</sub> copolymers

H-Type PtBMA<sub>2</sub>-*b*-HTPB-*b*-PtBMA<sub>2</sub> multiblock copolymers were synthesized through ATRP of *t*BMA in a Schlenk tube at molar ratios of [Cl<sub>2</sub>-HTPB-Cl<sub>2</sub>]/[CuBr]/[HMTETA]/[*t*BMA] of 1/7/8/*x* (*x*=150 and 300) at 90 °C in DMSO/THF (*v/v*=1:1) mixed solvent. Typically, 0.5044 g (0.202 mmol) Cl<sub>2</sub>-HTPB-Cl<sub>2</sub>, 0.4396 ml (1.616 mmol) HMTETA, 4.8477 ml (30.48 mmol) *t*BMA and magnetic bar were charged into a predried Schlenk flask. 0.2028 g CuBr (1.414 mmol) was rapidly added into the flask to allow the formation of a CuBr/HMTETA complex, followed by addition of 8 ml DMSO/THF (1:1, *v/v*) solvent. The Schlenk flask was degassed and deoxygenized via a three consecutive standard ‘freeze-pump-thaw’ cycle. The polymerization tube was sealed and allowed to proceed for 24 h at 90 °C. The vial was quenched and the reaction mixture was diluted with THF. The diluted mixture was passed through a neutral Al<sub>2</sub>O<sub>3</sub> column to remove copper complex. After removing most THF by rotary evaporation, the crude polymer solution was precipitated in tenfold excess methanol/cold diethyl ether. The resultant product was obtained by filtration and drying in a vacuum oven at room temperature until constant weight (*Yield*: 46 %), with number average molecular weight (*M<sub>n</sub>*) of 19870 by *SEC*, and 15160 by <sup>1</sup>H NMR, named ‘Polym A’ or ‘P(*t*BMA<sub>22</sub>)<sub>2</sub>-*b*-HTPB-*b*-P(*t*BMA<sub>22</sub>)<sub>2</sub>’. Likewise, when the monomer *t*BMA of 9.6954 ml (60.96 mmol) was poured into the reaction system, the

copolymer with  $M_n$  of 28320 by SEC and 20300 by  $^1\text{H}$  NMR was obtained, and denominated ‘Polym B’ or ‘ $\text{P}(t\text{BMA}_{31})_2$ -*b*-HTPB-*b*- $\text{P}(t\text{BMA}_{31})_2$ ’.  $^1\text{H}$  NMR (300 MHz,  $\text{CDCl}_3$ ,  $\delta$  in ppm): 5.49 (*br, m*, methyne proton signals  $-\text{CH}=\text{CH}_2$  at in 1,2-*vinyl* terminated ( $\alpha$ -olefin) structure), 5.41 (*br, m*,  $-\text{CH}_2-\text{CH}=\text{CH}-\text{CH}_2-$  in *cis/trans*-1,4 olefinic structure), 4.97 (*br, d*, 1,2-*vinyl*  $-\text{CH}=\text{CH}_2$ ), 2.26 (*br, m*,  $-\text{CH}_2-\text{CH}-\text{CH}=\text{CH}_2-$  and  $\text{OOCCH}-$  in initiator residues, and 2.03 (*br, m*,  $-\text{CH}_2-\text{CH}=\text{CH}-\text{CH}_2-$ ), 1.26 (*br, m*, methylene protons in  $-\text{CH}_2-\text{CH}-\text{CH}=\text{CH}_2$ ); 1.04-1.14 (s,  $-\text{CH}_2\text{C}(\text{CH}_3)\text{OOC}(\text{CH}_3)_3-$  from PtBMA blocks ), 1.41 (s,  $-\text{C}(\text{CH}_3)_3$  from PtBMA blocks) and 1.56-1.83 (*br, m*,  $-\text{CH}_2\text{C}(\text{CH}_3)\text{OOC}(\text{CH}_3)_3-$  from PtBMA blocks), revealing that the *t*BMA monomer has polymerized to  $\text{PtBMA}_2$ -*b*-HTPB-*b*- $\text{PtBMA}_2$  block copolymers.

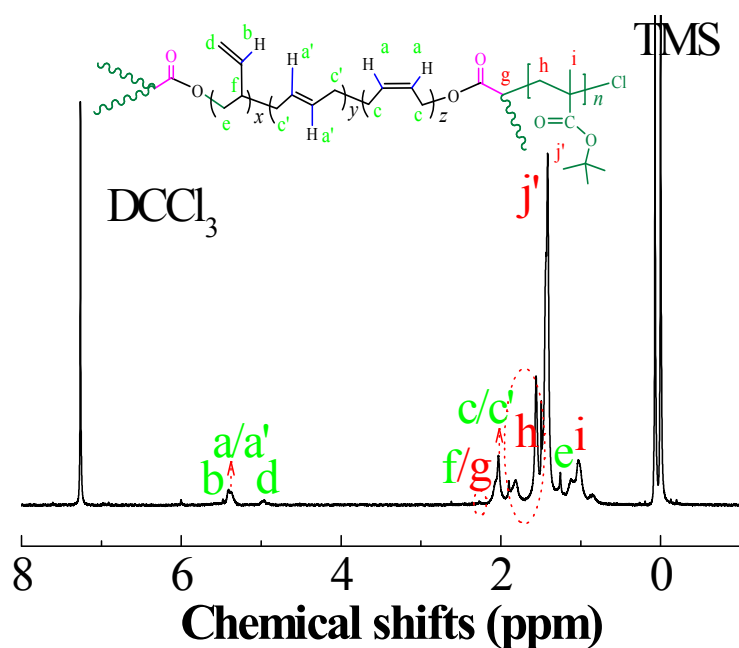

Figure S2  $^1\text{H}$  NMR spectra of a representative  $\text{PtBMA}_2$ -*b*-HTPB-*b*- $\text{PtBMA}_2$  block copolymer.

## 2. Characterization of the unepoxidized PMAA<sub>2</sub>-*b*-HTPB-*b*-PMAA<sub>2</sub> copolymers

Table 1 Sample codes and structural parameters of the PMAA<sub>2</sub>-*b*-HTPB-*b*-PMAA<sub>2</sub> copolymers before epoxidization.

| Codes | [Initiator]/<br>[ <i>t</i> BMA] <sup>a</sup> | M <sub>n</sub> by<br>NMR | M <sub>n</sub> by<br><i>SEC</i> | M <sub>w</sub> | PDI  | Percentage of<br>acidolysis, % | Unit ratios of<br>butadiene to MAA |
|-------|----------------------------------------------|--------------------------|---------------------------------|----------------|------|--------------------------------|------------------------------------|
| AE0   | 1:150                                        | 9870                     | 14930                           | 16720          | 1.12 | 88                             | 21/44                              |
| BE0   | 1:300                                        | 12960                    | 21360                           | 23280          | 1.09 | 87                             | 21/62                              |

<sup>a</sup> Mole ratios of [Cl<sub>2</sub>-HTPB-Cl<sub>2</sub>] to [*t*BMA]. The copolymers with mole ratios of [Cl<sub>2</sub>-HTPB-Cl<sub>2</sub>]/[*t*BMA] of 1:150 and 1:300 are named P(*t*BMA<sub>22</sub>)<sub>2</sub>-*b*-HTPB-*b*-P(*t*BMA<sub>22</sub>)<sub>2</sub>, and P(*t*BMA<sub>31</sub>)<sub>2</sub>-*b*-HTPB-*b*-P(*t*BMA<sub>31</sub>)<sub>2</sub>, or “Polym A” and “Polym B”, respectively.
